# Supplementary material for: High performance dengue virus antigen-based serotyping-NS1-ELISA (plus): A simple alternative approach to identify dengue virus serotypes in acute dengue specimens
Source: PubMed Central journal article supplement (PMC7946175; doi:10.1371/journal.pntd.0009065), 2021-02-26
Supplement: pntd.0009065.s001.pdf [file pntd.0009065.s001.pdf]

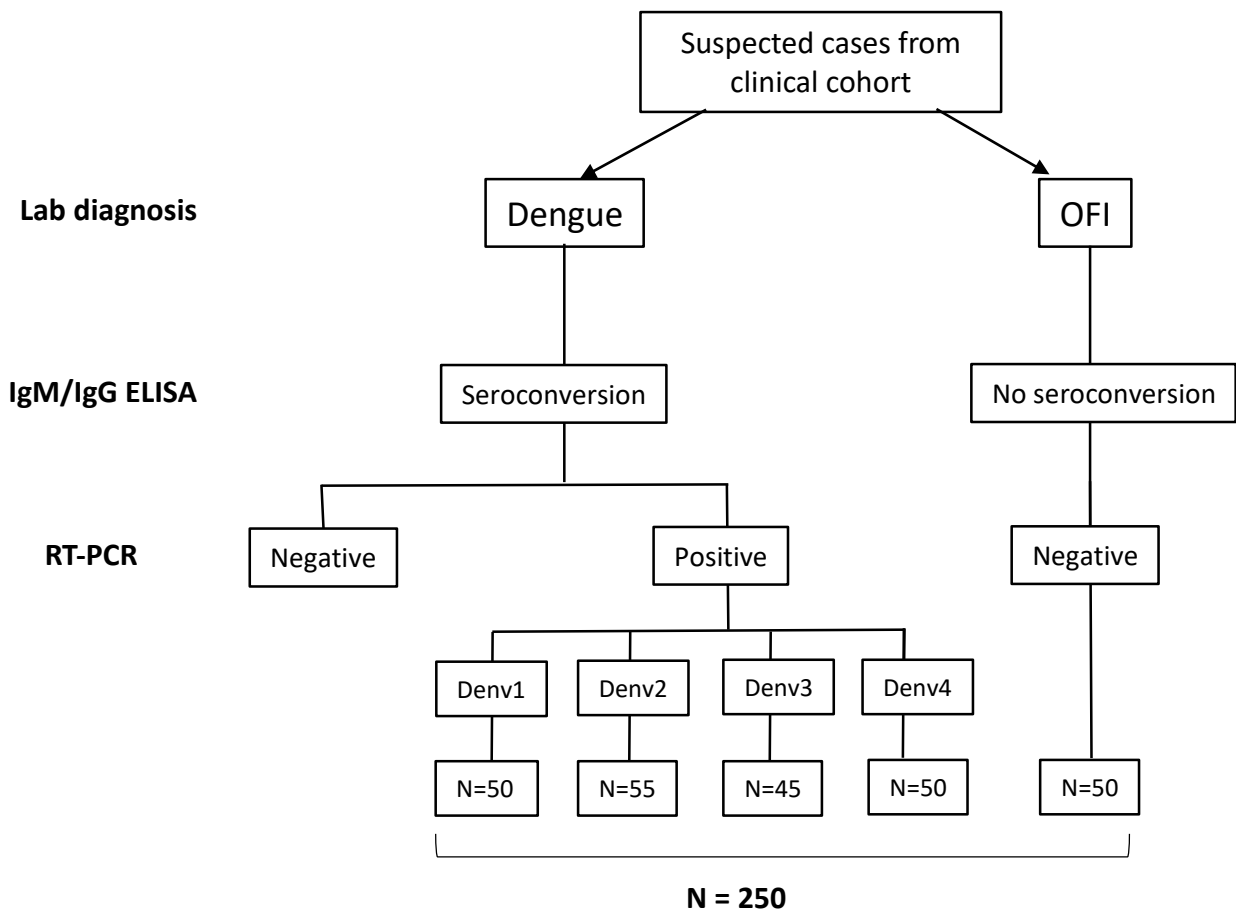

**S1 Fig. Schematic diagram of selected panels of dengue clinical specimens for assay validation.**
