# Supplementary material for: High performance dengue virus antigen-based serotyping-NS1-ELISA (plus): A simple alternative approach to identify dengue virus serotypes in acute dengue specimens
Source: PubMed Central journal article supplement (PMC7946175; doi:10.1371/journal.pntd.0009065), 2021-02-26
Supplement: pntd.0009065.s004.pdf [file pntd.0009065.s004.pdf]

**S1 Table. Characteristics and properties of anti-NS1 Mabs used in this study**

| No. | Mab name (1)  | Mab name (2) | Isotype | Reactivity to DENV serotype | Type of Epitope |
|-----|---------------|--------------|---------|-----------------------------|-----------------|
| 1   | D1NS1-84      | 84B          | IgG1    | 1                           | conformation    |
| 2   | D2NS1-3D1     | 3D1          | IgG1    | 1, 2                        | conformation    |
| 3   | D2NS1-1A4     | 1A4          | IgG2a   | 2                           | conformation    |
| 4   | D2NS1-1B10    | 1B10         | IgG1    | 2                           | linear          |
| 5   | D2NS1-2C5     | 2C5          | IgM     | 2                           | conformation    |
| 6   | D2NS1-4B4     | 4B4          | IgM     | 2                           | conformation    |
| 7   | D2NS1-1B2     | 1B2          | IgG1    | 1-4                         | linear          |
| 8   | D2NS1-2G6     | 2G6          | IgM     | 1, 2                        | conformation    |
| 9   | D2NS1-3A2     | 3A2          | IgG1    | 2                           | conformation    |
| 10  | D2NS1-4D2     | 4D2          | IgG1    | 1-4                         | linear          |
| 11  | D3NS1-7       | 7A           | IgG2b   | 3                           | conformation    |
| 12  | D3NS1-46      | 46A          | IgG2b   | 3                           | conformation    |
| 13  | D3NS1-5F3     | 5F3          | IgG1    | 1, 3                        | linear          |
| 14  | D4NS1-4       | 4A           | IgG2b   | 4                           | conformation    |
| 15  | D4NS1-24      | 24A          | IgG1    | 4                           | conformation    |
| 16  | D4NS1-181     | 181          | IgG1    | 4                           | conformation    |
| 17  | D4NS1-9       | S9.6         | IgG1    | 1, 4                        | linear          |
| 18  | NS1-1F (2E11) | 2E11         | IgM     | 1-4 and flaviviruses        | linear          |
| 19  | NS1-3F (1F11) | 1F11         | IgG2a   | 1-4                         | linear          |
| 20  | NS1-4F (2E3)  | 2E3          | IgG1    | 1-4                         | linear          |

(1) Mabs named according to previous publications; No.1-17 (Puttikhunt et al, 2011), No 18-20 (Puttikhunt et al, 2003)

(2) Mabs named as abbreviation in this study.
