# Supplementary material for: High performance dengue virus antigen-based serotyping-NS1-ELISA (plus): A simple alternative approach to identify dengue virus serotypes in acute dengue specimens
Source: PubMed Central journal article supplement (PMC7946175; doi:10.1371/journal.pntd.0009065), 2021-02-26
Supplement: pntd.0009065.s005.pdf [file pntd.0009065.s005.pdf]

**S2 Table. Summary of immune status, severity and dengue serotypes of acute-phase patients' plasma used in this study.**

| Acute-phase plasma                  | No. of samples  | Serotyping by RT-PCR |               |               |               |
|-------------------------------------|-----------------|----------------------|---------------|---------------|---------------|
|                                     |                 | DENV1                | DENV2         | DENV3         | DENV4         |
| <b>DENV cases (PCR positive)</b>    | <b>200</b>      | <b>50</b>            | <b>55</b>     | <b>45</b>     | <b>50</b>     |
| <b>Primary infection (DF/DHF)</b>   | 4<br>(2/2)      | 3<br>(1/2)           | 0<br>(0/0)    | 1<br>(1/0)    | 0<br>(0/0)    |
| <b>Secondary infection (DF/DHF)</b> | 196<br>(76/119) | 47<br>(20/27)        | 55<br>(16/38) | 44<br>(19/25) | 50<br>(21/29) |
| <b>OFI</b>                          | <b>50</b>       | 0                    | 0             | 0             | 0             |
