# Supplementary material for: High performance dengue virus antigen-based serotyping-NS1-ELISA (plus): A simple alternative approach to identify dengue virus serotypes in acute dengue specimens
Source: PubMed Central journal article supplement (PMC7946175; doi:10.1371/journal.pntd.0009065), 2021-02-26
Supplement: pntd.0009065.s006.pdf [file pntd.0009065.s006.pdf]

**S3 Table.** Binding kinetics of anti-NS1 Mabs to dengue NS1 antigen by Surface Plasmon Resonance (SPR)

| Antibody name | Specificity | rD1NS1                             |                                  |               | rD2NS1                             |                                  |               | rD3NS1                             |                                  |               |
|---------------|-------------|------------------------------------|----------------------------------|---------------|------------------------------------|----------------------------------|---------------|------------------------------------|----------------------------------|---------------|
|               |             | $K_{on}$<br>( $10^4M^{-1}s^{-1}$ ) | $K_{off}$<br>( $10^{-4}s^{-1}$ ) | $K_D$<br>(nM) | $K_{on}$<br>( $10^4M^{-1}s^{-1}$ ) | $K_{off}$<br>( $10^{-4}s^{-1}$ ) | $K_D$<br>(nM) | $K_{on}$<br>( $10^4M^{-1}s^{-1}$ ) | $K_{off}$<br>( $10^{-4}s^{-1}$ ) | $K_D$<br>(nM) |
| 1B10          | D2          |                                    |                                  |               | 26.10±6.43                         | 8.14±1.01                        | 3.18±0.37     |                                    |                                  |               |
| 3D1           | D2          |                                    |                                  |               | 61.70±55.52                        | 11.0±6.22                        | 2.02±0.43     |                                    |                                  |               |
| 1A4           | D2          |                                    |                                  |               | 35.00±26.16                        | 16.80±1.97                       | 6.25±4.07     |                                    |                                  |               |
| 4B4           | D2          |                                    |                                  |               | ND                                 | ND                               | ND            |                                    |                                  |               |
| 5F3           | D1, D3      | 5.53±0.74                          | 2.58±0.48                        | 4.72±1.00     |                                    |                                  |               | 8.37±2.92                          | 1.93±0.46                        | 2.44±0.59     |
| 84B           | D1          | 2.49±1.24                          | 12.3±7                           | 54.8±24.5     |                                    |                                  |               |                                    |                                  |               |
| 46A           | D3          |                                    |                                  |               |                                    |                                  |               | 21.30±16.26                        | 20.50±10.24                      | 12.30±7.00    |

ND = Unable to determine due to its over ranged values.
